# Supplementary material
Source: MDPI journal article supplement (https://www.mdpi.com/2313-433X/9/1/19)
Supplement: s1 [file s1]

**Table of Content**

|                                                                    |       |
|--------------------------------------------------------------------|-------|
| UV Visible, emission and normalised fluorescence spectra and table | S2–S3 |
| Photostability study of both CQDs under UV light exposure          | S4    |
| pH dependent study of both CQDs                                    | S4    |
| High resolution XPS spectra of WMEA and WMED CQDs                  | S5    |
| Metal binding properties of WMED                                   | S5    |
| Metal binding properties of WMEA and Interference studies of WMED  | S6    |
| MTT essay and HeLa cell imaging                                    | S7    |
| Comparison table with References                                   | S8    |

WM (without ligand treated)

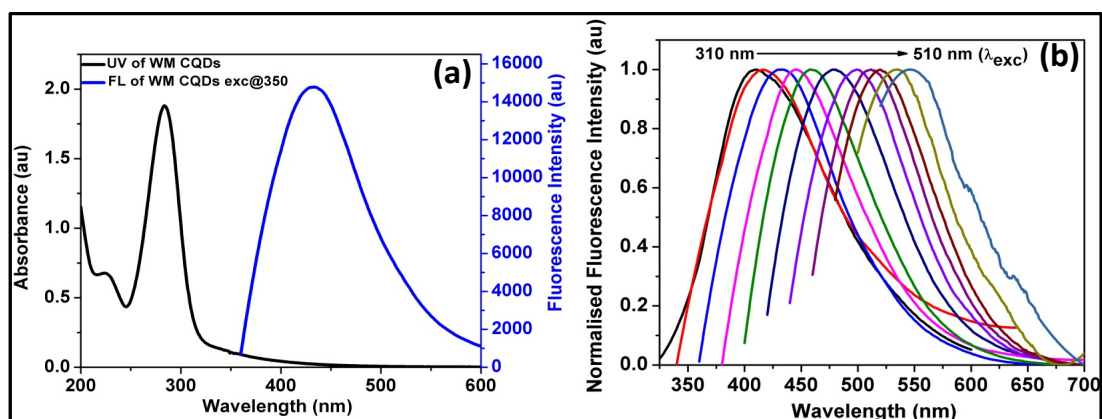

WMEA (Treated with ethanolamine)

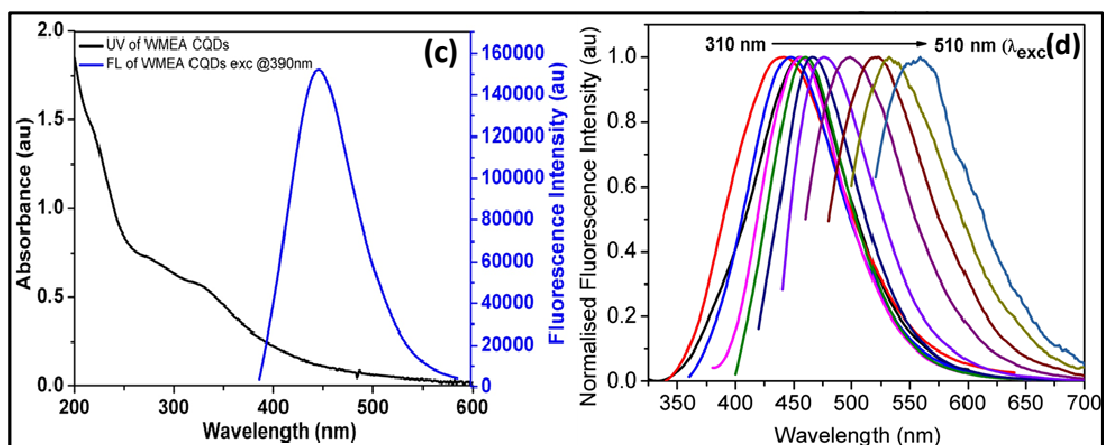

WMED (Treated with ethylene diamine)

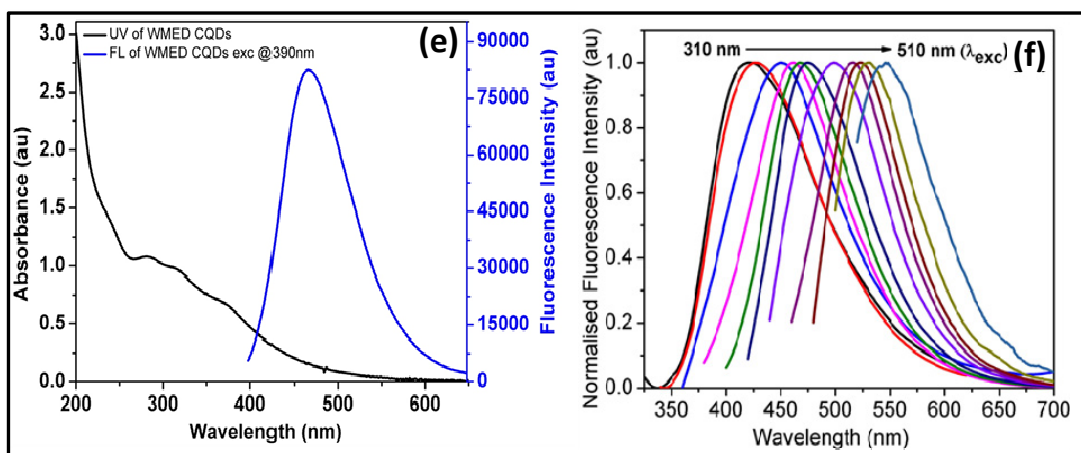

### WMSA (Treated with succinic acid)

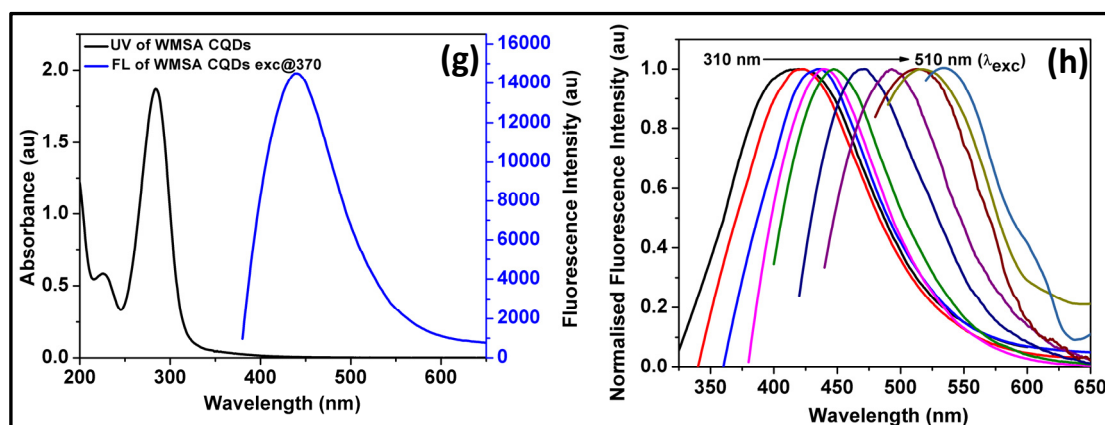

### WMEG (Treated with ethylene glycol)

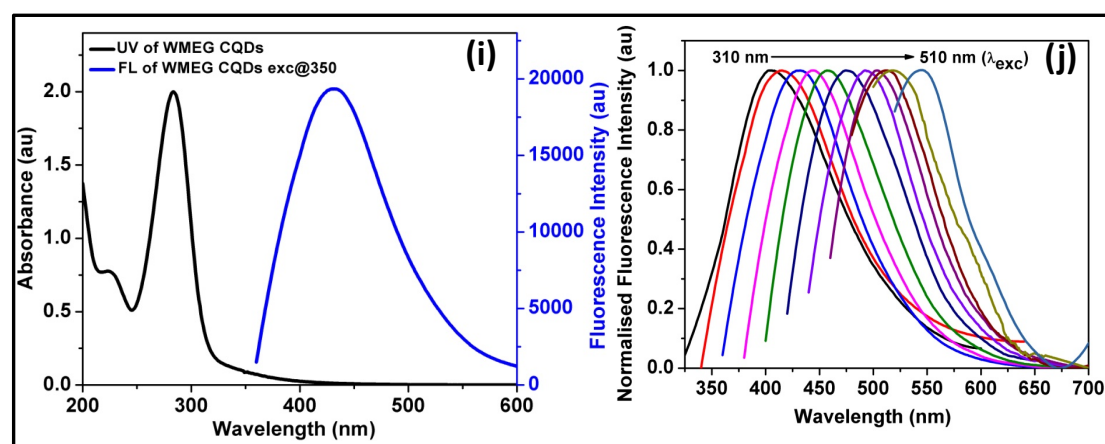

**Figure S1.** UV-visible absorption, emission and Excitation dependent emission spectra of (a,b) WM CQDs (c,d) WMEA CQDs (e,f) WMED CQDs (g,h) WMSA CQDs (i,j) WMEG CQDs in aqueous medium.

**Table S2.** Absorption and Emission values of CQDs.

| S. No. | CQDs | Absorption Range (nm) | Absorbance Maxima (nm) | Excitation $\lambda_{ex}$ (nm) | Emission maxima $\lambda_{em}$ (nm) |
|--------|------|-----------------------|------------------------|--------------------------------|-------------------------------------|
| 1      | WM   | 245-335               | 285                    | 350                            | 433                                 |
| 2      | WMEA | 250-400               | 305                    | 390                            | 468                                 |
| 3      | WMED | 250-410               | 315                    | 390                            | 470                                 |
| 4      | WMSA | 245-335               | 283                    | 370                            | 441                                 |
| 5      | WMEG | 245-335               | 283                    | 350                            | 430                                 |

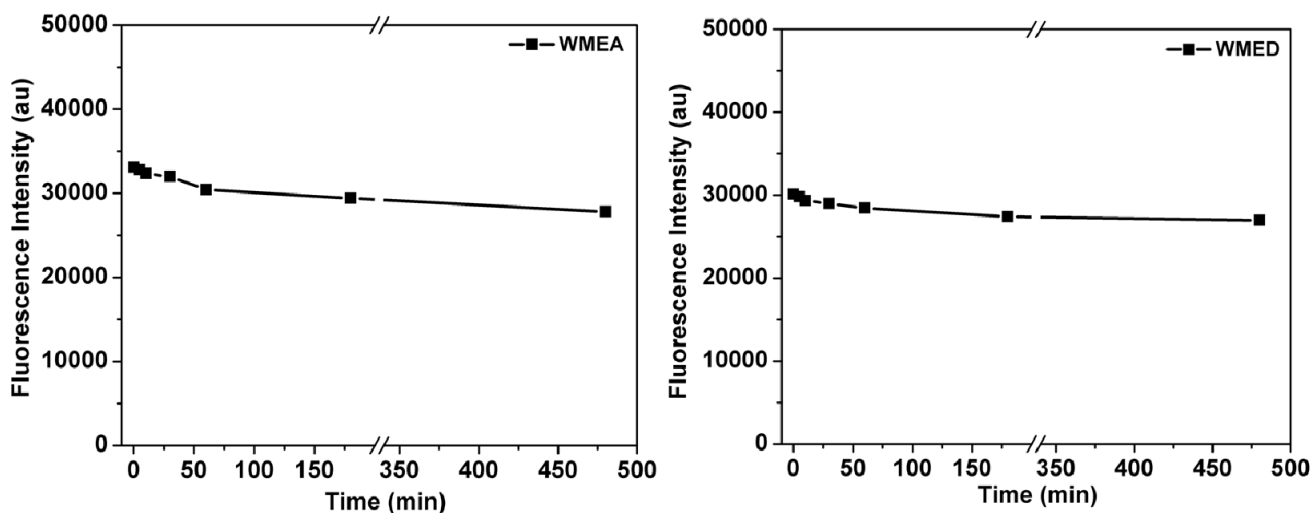

**Figure S2.** Photostability test of CQDs under continuous irradiation of the 365 nm light with different time intervals. (a) Plot of the fluorescence intensity of WMEA-CQDs at emission maximum ( $\lambda_{\text{max,em}}$  465 nm) and (b) Plot of the fluorescence intensity of WMED-CQDs at emission maximum ( $\lambda_{\text{max,em}}$  470 nm) (performed in aqueous medium with excitation wavelength of 370 nm).

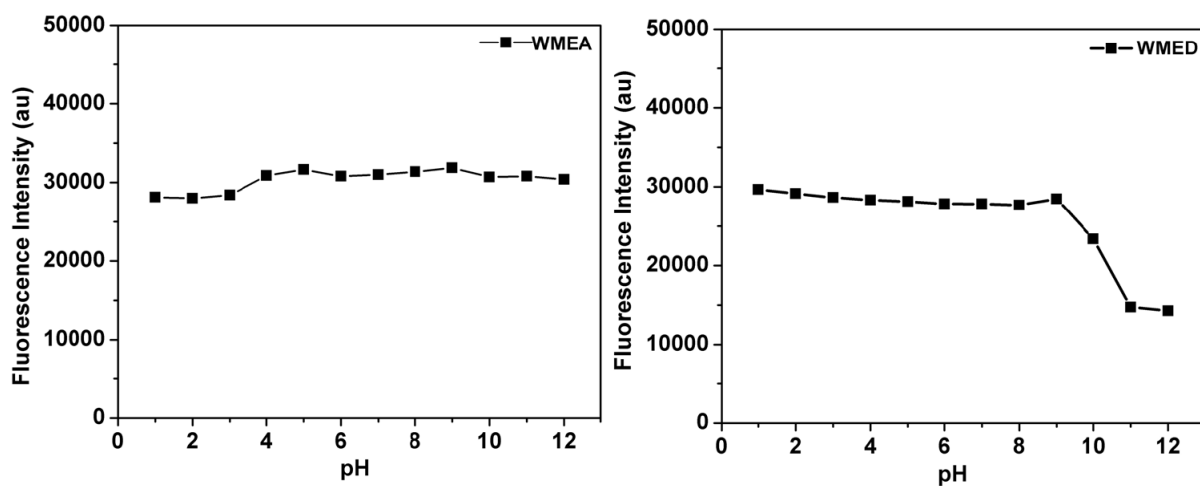

**Figure S3.** pH dependence of fluorescence response of (a) WMEA-CQDs and (b) WMED-CQDs in various pH ranges.

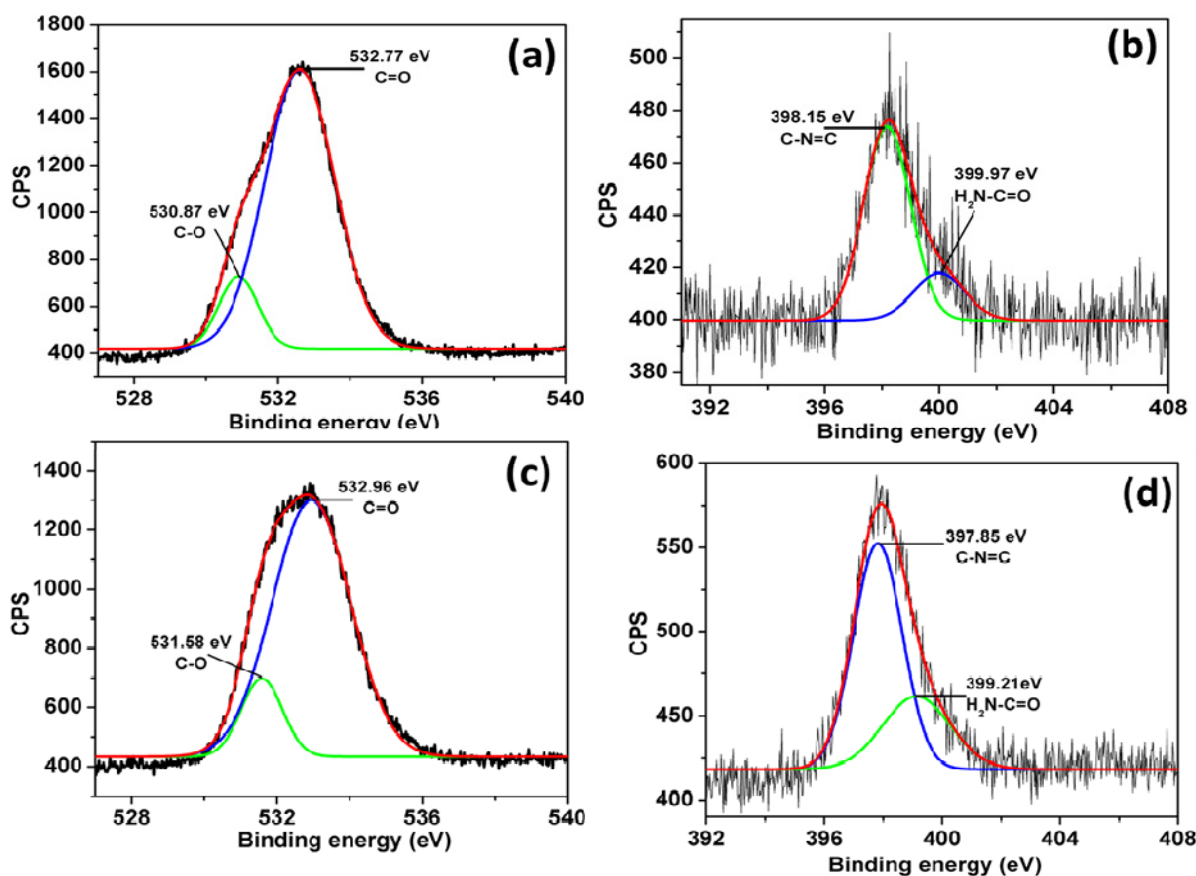

Figure S4. High resolution XPS spectra of the WMEA CQDs in (a) O1s region, (b) N1s region and WMED CQDs in (c) O1s region (d) N1s region.

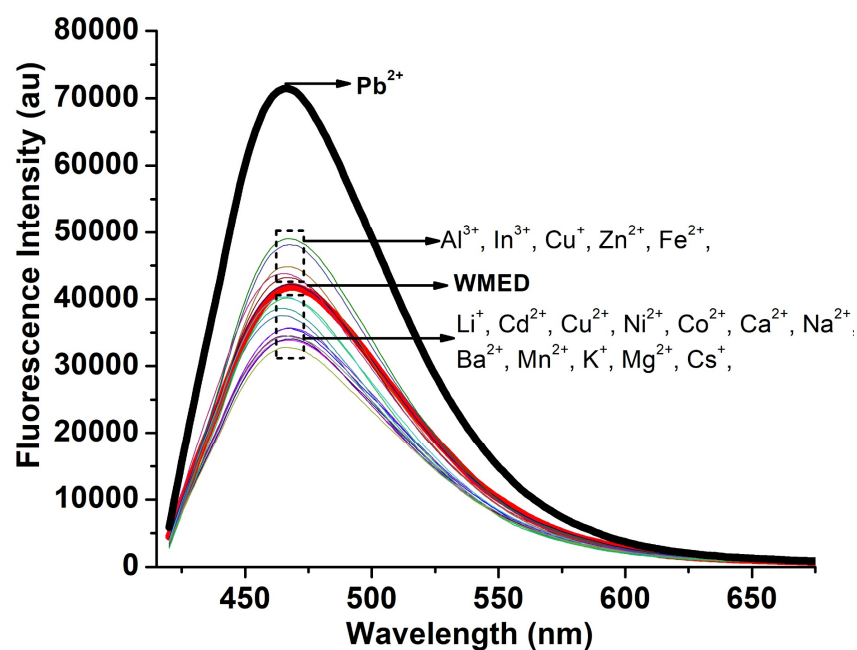

Figure S5. Metal binding properties of WMED to different metal ions. The concentration of metal ions was  $1 \times 10^{-4}$  M.

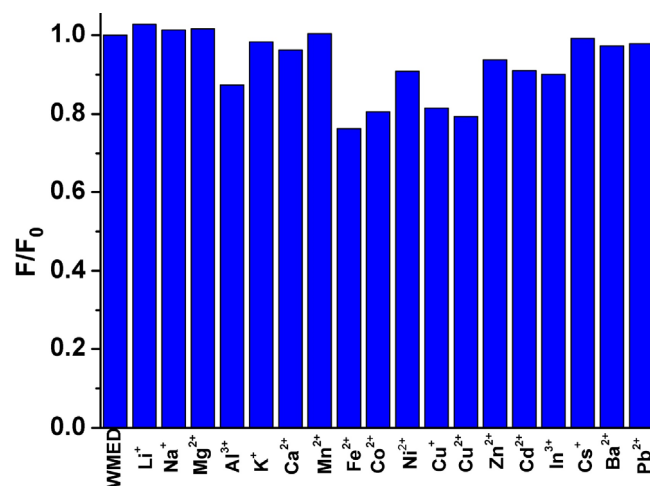

**Figure S6.** Metal binding properties of the WMEA to different metal ions. The concentration of  $\text{Pb}^{2+}$  and other metal ions was  $1 \times 10^{-4}\text{M}$ .

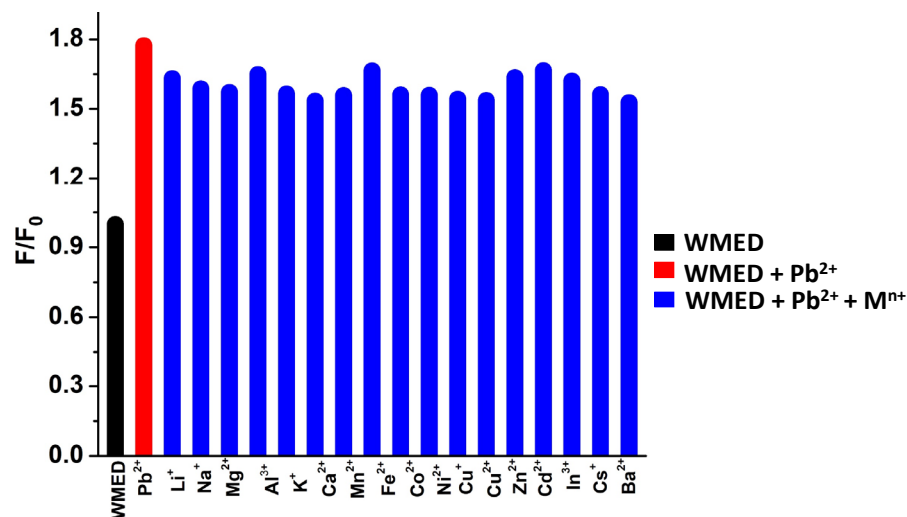

**Figure S7.** Selective fluorescence response of WMED towards  $\text{Pb}^{2+}$  ions (red bar), and interference of other metal ions with  $\text{Pb}^{2+}$  ions (blue bars) in Water.  $F_0$  is the emission intensity of WMED in the absence of metal ions.  $F$  is the emission intensity of WMED with various metal ions. The concentration of  $\text{Pb}^{2+}$  and other metal ions was  $1 \times 10^{-4}\text{M}$ .

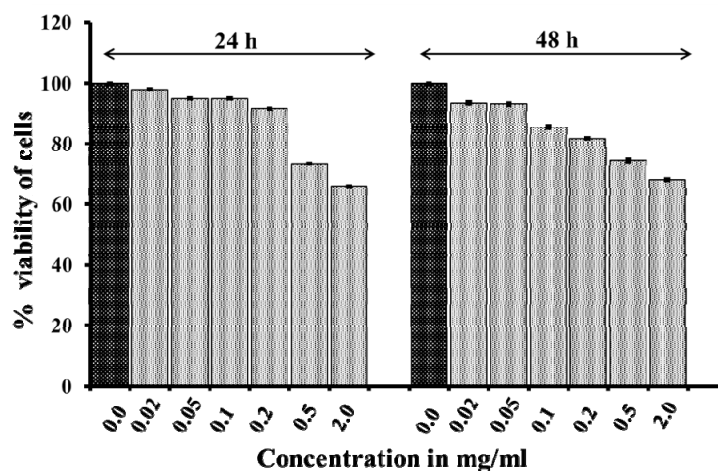

**Figure S8.** Cell viability assessment of WMED in cervical cancer cell line HeLa did not show any significant toxicity up to  $0.2\text{ mg/mL}$  concentration of WMED.

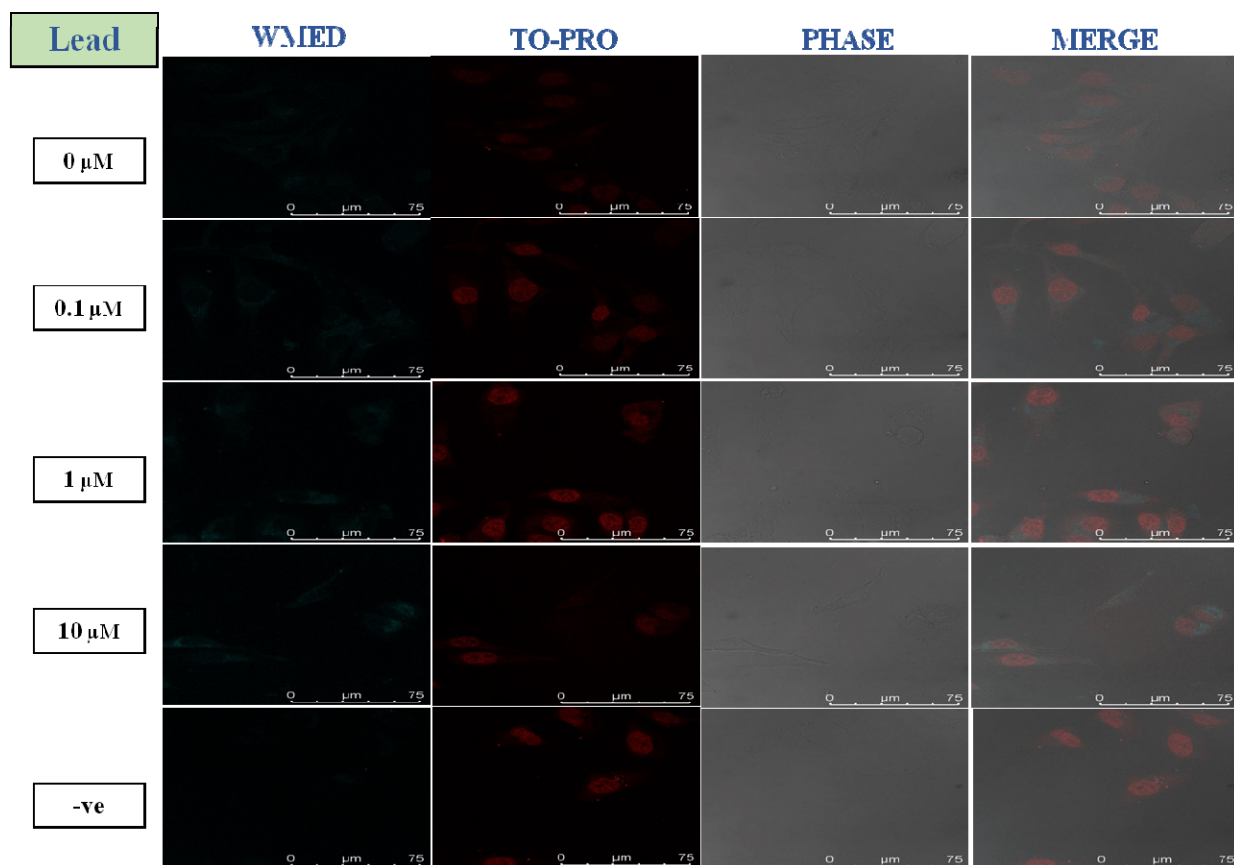

**Figure S9.** Staining of Live HeLa cells with 0.06mg/mL WMED Confocal microscopy images at 100X Magnification. Live HeLa cells incubated with Lead at 0.1  $\mu$ M, 1  $\mu$ M, and 10  $\mu$ M concentration for 30 min and then WMED for 1 h. Spectra recorded for WMED at  $\lambda_{ex}$  405 nm/  $\lambda_{em}$  450–550 nm. Nucleus is stained with TO-PRO nuclear dye  $\lambda_{ex}$  641 nm/  $\lambda_{em}$  661 nm.

**Table S1.** Carbon Quantum Dots for Pb<sup>2+</sup> ions.

| Probe                                                                             | LOD                        | Mechanism                                                                                                                                                                                                   | References                                           |
|-----------------------------------------------------------------------------------|----------------------------|-------------------------------------------------------------------------------------------------------------------------------------------------------------------------------------------------------------|------------------------------------------------------|
| Gallic acid–Au NPs                                                                | 5.0 uM                     | Based on absorbance <b>Title</b> In Situ Synthesis of Metal Nanoparticles and Selective Naked-Eye Detection of Lead Ions from Aqueous Media                                                                 | J. Phys. Chem.C, 2007, 111, 12839–12847.             |
| Glutathione-Capped Quantum Dots                                                   | 40nm                       | Quenching <b>Title</b> Ultrasensitive Pb2+ Detection by Glutathione-Capped Quantum Dots                                                                                                                     | Anal. Chem. 2007, 79, 9452–9458                      |
| Peptide–Au NPs                                                                    | 242 nM                     | Based on absorbance and no selectivity. <b>Title</b> Colorimetric Response of Peptide- Functionalized Gold Nanoparticles to Metal Ions                                                                      | Small, 2008, 4, 548–551.                             |
| 2-ME/S <sub>2</sub> O <sub>3</sub> <sup>2-</sup> -Au NPs                          | 0.5 nM                     | Quenching <b>Title</b> Colorimetric Assay for Lead Ions Based on the Leaching of Gold Nanoparticles                                                                                                         | Anal. Chem., 2009, 81, 9433–9439.                    |
| Au NPs, DNAzyme and substrate                                                     | 0.5 uM                     | Quenching <b>Title</b> DNAzyme-based colorimetric sensing of lead (Pb2+) using unmodified gold nanoparticle probes                                                                                          | Nanotechnology, 2008, 19, 095501                     |
| Au NPs, DNAzyme and substrate                                                     | 3.0 nM                     | Absorbance <b>Title</b> Label-Free Colorimetric Detection of Lead Ions with a Nanomolar Detection Limit and Tunable Dynamic Range by using Gold Nanoparticles and DNAzyme                                   | Adv. Mater., 2008, 20, 3263–3267.                    |
| DNA–Au NPs, DNAzyme and substrate                                                 | 10 uM                      | <b>Title</b> Enzymatic Cleavage of Nucleic Acids on Gold Nanoparticles:A Generic Platform for Facile Colorimetric Biosensors                                                                                | Small,2008, 4, 810–816.                              |
| DNA–Au NPs, DNAzyme and substrate                                                 | 0.5 uM                     | <b>Title</b> Easy-to-use dipstick tests for detection of lead in paints using non-cross-linked gold nanoparticle–DNAzyme conjugates                                                                         | Chem. Commun., 2010, 46, 1416–1418.                  |
| DNA–Au NPs, DNAzyme and substrate                                                 | 0.4 uM                     | <b>Title</b> Accelerated Color Change of Gold Nanoparticles Assembled by DNAzymes for Simple and Fast Colorimetric Pb2+ Detection                                                                           | J. Am. Chem. Soc., 2004, 126, 12298–12305.           |
| Single-labeled hairpin                                                            | 0.4 nM                     | Quenching <b>Title</b> Single-labeled hairpin probe for highly specific and sensitive detection of lead(II) based on the fluorescence quenching of deoxyguanosine and G-quartet                             | Biosensors and Bioelectronics 41 (2013) 137–142      |
| CdSe/CdS quantum dots                                                             | 0.006 nmol L <sup>-1</sup> | Dithizone functionalized CdSe/CdS quantum dots as turn-on fluorescent probe for ultrasensitive detection of lead ion                                                                                        | Journal of Hazardous Materials 250– 251 (2013) 45–52 |
| Graphene Quantum Dots/L-Cysteine                                                  | 70 nM.                     | Quenching <b>Title</b> Graphene Quantum Dots/L-Cysteine Coreactant Electrochemiluminescence System and Its Application in Sensing Lead(II) Ions                                                             | ACS Appl. Mater. Interfaces 2014, 6, 1646–1651       |
| CdSe/ZnS QDs                                                                      | 0.99 nmol L <sup>-1</sup>  | Quenching <b>Title</b> Cathodic electrochemiluminescence of a CdSe/ZnS QDs-modified glassy carbon electrode and its application in sensing of Pb <sup>2+</sup>                                              | Anal. Methods, 2015, 7, 1395–1400                    |
| CQDs from Watermelon juice using ethylenediamine as surface functionalizing agent | 0.19 nM                    | Fluorescence enhancement <b>Title</b> Picomolar Detection of Lead Ions (Pb <sup>2+</sup> ) by Functionally Modified Fluorescent Carbon Quantum Dots from Watermelon Juice and their Imaging in Cancer Cells | (Present Work)                                       |
